# Supplementary material for: Plasma Biomarkers for Early Detection and Staging of Alzheimer’s Disease: A Cross-Sectional Study in a Japanese Cohort
Source: Research Square preprint supplement (doi:10.21203/rs.3.rs-6239779/v1), 2025-03-27
Supplement: Supplementary file 1 [file 2be2649eb6b9132e85d62cdf.xlsx]

## Sheet: 250104_bm_cl_cs_corr
Table S2 Spearman’s correlation coefficients between each biomarker and cognitive scores
	Aβ42/40	p-tau181	p-tau217	GFAP	NfL	p-tau217/Aβ42	CL
MMSE	0.55	-0.505	-0.577	-0.426	-0.322	-0.618	-0.567
ADAS-Cog	-0.612	0.595	0.688	0.549	0.407	0.687	0.669
LM-I	0.629	-0.581	-0.718	-0.563	-0.364	-0.726	-0.736
LM-D	0.633	-0.58	-0.696	-0.587	-0.337	-0.699	-0.737
WF-C	0.528	-0.478	-0.565	-0.466	-0.429	-0.564	-0.546
WF-I	0.247	-0.221	-0.297	-0.302	-0.274	-0.288	-0.276
TMTJ-A	-0.336	0.36	0.424	0.308	0.388	0.404	0.418
TMTJ-B	-0.459	0.502	0.576	0.478	0.419	0.575	0.571
Abbreviations: Aβ, amyloid beta; p-tau, phosphorylated tau; GFAP, glial fibrillary acidic protein; NfL, neurofilament light chain; CL, Centiloid; MMSE, Mini-Mental State Examination; ADAS-Cog, Alzheimer’s Disease Assessment Scale–Cognitive Subscale; LM-I, Logical Memory I Immediate Recall; LM-D, Logical Memory II Delayed Recall; WF-C, Word Fluency Test Category; WF-I, Word Fluency Test Initial Le…
