# Supplementary material for: Plasma Biomarkers for Early Detection and Staging of Alzheimer’s Disease: A Cross-Sectional Study in a Japanese Cohort
Source: Research Square preprint supplement (doi:10.21203/rs.3.rs-6239779/v1), 2025-03-27
Supplement: Supplementary file 2 [file aa31c11ead710ff0bab80029.xlsx]

## Sheet: 250104_bm_bmpair_roc
Table S1 Performance metrics of single biomarker and biomarker combinations
	Cut-off	AUC	Sensitivity	Specificity	PPV	NPV
AD continuum vs HC + non-AD dementia
Aβ42/40	0.0955	0.931	0.832	0.947	0.961	0.781
p-tau181 (pg/mL)	31.9	0.824	0.723	0.839	0.739	0.828
p-tau217 (pg/mL)	0.54	0.924	0.904	0.866	0.81	0.935
GFAP (pg/mL)	290	0.795	0.809	0.651	0.594	0.843
NfL (pg/mL)	22.7	0.592	0.585	0.617	0.491	0.702
p-tau217/Aβ42	0.0298	0.944	0.936	0.859	0.807	0.955
p-tau217/Aβ40	0.00335	0.934	0.872	0.893	0.837	0.917
Aβ40/Aβ42	10.5	0.931	0.947	0.832	0.781	0.961
p-tau217×GFAP	189	0.909	0.915	0.812	0.754	0.938
Aβ40×p-tau217	88.6	0.904	0.904	0.799	0.739	0.93
AD-MCI + AD-D vs non-AD dementia
Aβ42/40	0.0927	0.907	0.863	0.889	0.885	0.867
p-tau181 (pg/mL)	33.4	0.782	0.704	0.812	0.792	0.73
p-tau217 (pg/mL)	0.54	0.89	0.926	0.8	0.824	0.914
GFAP (pg/mL)	345	0.733	0.728	0.662	0.686	0.707
NfL (pg/mL)	13.7	0.456	0.963	0.125	0.527	0.769
p-tau217/Aβ42	0.042	0.921	0.852	0.875	0.873	0.854
p-tau217/Aβ40	0.00352	0.907	0.864	0.85	0.854	0.861
Aβ40/Aβ42	10.8	0.907	0.889	0.863	0.867	0.885
p-tau217/NfL	0.0291	0.883	0.778	0.875	0.863	0.795
p-tau217/p-tau181	0.0201	0.878	0.877	0.812	0.826	0.867
preAD vs HC
Aβ42/40	0.0983	0.968	0.884	1	1	0.619
p-tau181 (pg/mL)	23.6	0.815	0.846	0.754	0.393	0.963
p-tau217 (pg/mL)	0.423	0.958	1	0.855	0.565	1
GFAP (pg/mL)	286	0.804	0.692	0.826	0.429	0.934
NfL (pg/mL)	18.6	0.751	0.846	0.667	0.324	0.958
p-tau217/Aβ42	0.0312	0.979	1	0.942	0.765	1
p-tau217/Aβ40	0.00263	0.969	1	0.884	0.619	1
Aβ40/Aβ42	10.2	0.968	1	0.884	0.619	1
GFAP/Aβ42	16.1	0.941	0.923	0.841	0.522	0.983
p-tau181×p-tau217	9.64	0.932	0.923	0.812	0.48	0.982
Abbreviations: AUC, area under the curve; PPV, positive predictive value; NPV, negative predictive value; AD, Alzheimer’s disease; HC, healthy control; AD-MCI, mild cognitive impairment due to AD; AD-D, AD dementia; preAD, preclinical AD; Aβ, amyloid beta; p-tau, phosphorylated tau; GFAP, glial fibrillary acidic protein; NfL, neurofilament light chain. The cut-off was determined using the Youden …
