# Supplementary material for: Plasma Biomarkers for Early Detection and Staging of Alzheimer’s Disease: A Cross-Sectional Study in a Japanese Cohort
Source: Research Square preprint supplement (doi:10.21203/rs.3.rs-6239779/v1), 2025-03-27
Supplement: Supplementary file 3 [file d63d868dd899fd71d0104bd1.xlsx]

## Sheet: 250104_bm_bmpair_roc
Table S3 Statistical Tests Comparing Biomarkers Across AD Stages
	Kruskal-Wallis Test † (H, p-value)	Linear Contrast † (p-value)	TOST (p-value)
			preAD vs AD-MCI	preAD vs AD-D	AD-MCI vs AD-D
Aβ42/40	H = 99.65, p = 1.846e-21	0.416	0.47	0.238	0.000611*
p-tau181	H = 76.08, p = 2.124e-16	0.0667	0.315	0.623	0.123
p-tau217	H = 108.8, p = 1.973e-23	0.0105*	0.72	0.821	0.0997
GFAP	H = 73.2, p = 8.814e-16	0.677	0.111	0.117	0.0189*
NfL	H = 32.23, p = 4.675e-07	0.212	0.303	0.306	0.0851
p-tau217/Aβ42	H = 108.8, p = 1.969e-23	0.0384*	0.331	0.675	0.223
Abbreviations: TOST, Two One-Sided Test; AD, Alzheimer’s disease; HC, healthy control; preAD, preclinical AD; AD-MCI, mild cognitive impairment due to AD; AD-D, AD dementia; Aβ, amyloid beta; p-tau, phosphorylated tau; GFAP, glial fibrillary acidic protein; NfL, neurofilament light chain. † The Kruskal–Wallis test was applied to the HC, preAD, AD-MCI, and AD-D groups, while a linear contrast, eva…
