# Supplementary material for: Plasma Biomarkers for Early Detection and Staging of Alzheimer’s Disease: A Cross-Sectional Study in a Japanese Cohort
Source: Research Square preprint supplement (doi:10.21203/rs.3.rs-6239779/v1), 2025-03-27
Supplement: Supplementary file 4 [file f790a201f561527388c2a26d.docx]

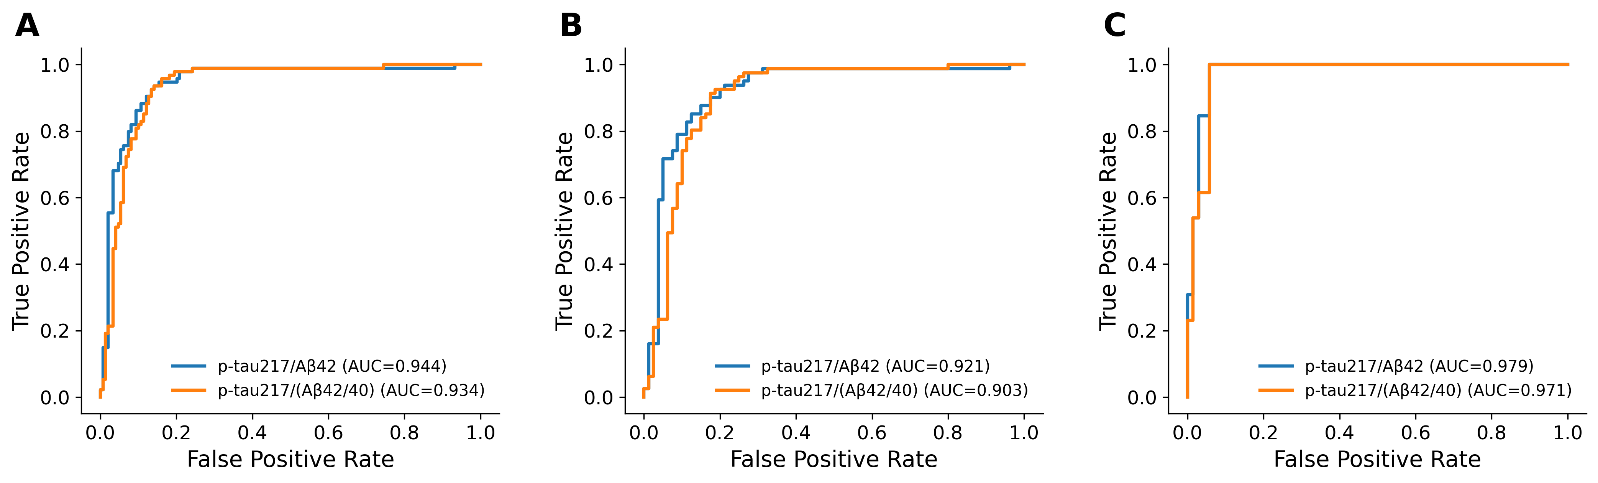


**Fig. S1** ROC analysis of p-tau217/(Aβ42/ Aβ40) vs. tau217/Aβ42. The comparison groups are as follows: A: AD continuum (n=94) vs. HC + non-AD dementia (n=149); B: AD-MCI + AD-D (n=81) vs. non-AD dementia (n=80); C: preAD (n=13) vs. HC (n=69).
